# Supplementary material for: Fibre supplementation for the prevention of type 2 diabetes and improvement of glucose metabolism: the randomised controlled Optimal Fibre Trial (OptiFiT)
Source: Springer Nature journal article supplement (doi:10.1007/s00125-018-4582-6), 2018-02-28
Supplement: MOESM1 [file 15497274]

| ESM Table 1 – Supplemental material; 1-year-changes in body composition, blood pressure, inflammatory markers and adipokines |                  |                 |         |
|------------------------------------------------------------------------------------------------------------------------------|------------------|-----------------|---------|
|                                                                                                                              | Placebo (n = 91) | Fibre (n = 89)  | P-value |
| Body weight (kg)                                                                                                             | -2.6 ± 5.2 **    | -2.0 ± 4.2 **   | 0.368   |
| Waist circumference (cm)                                                                                                     | -3.0 ± 6.0 **    | -2.3 ± 4.7 **   | 0.426   |
| Hip circumference (cm)                                                                                                       | -2.1 ± 5.1 **    | -1.8 ± 4.0 **   | 0.641   |
| WHR                                                                                                                          | -0.01 ± 0.05     | -0.01 ± 0.04    | 0.605   |
| BIA – Body fat (kg)                                                                                                          | -1.1 ± 4.1 *     | -0.2 ± 3.9      | 0.176   |
| RR, systolic (mmHg)                                                                                                          | -1 ± 15          | -1 ± 14         | 0.898   |
| RR, diastolic (mmHg)                                                                                                         | -0 ± 9           | 0 ± 10          | 0.981   |
| CRP (nmol/l)                                                                                                                 | -7.6 ± 25.7 *    | -7.6 ± 36.2 *   | 0.896   |
| Leukocyte count (/nl)                                                                                                        | 0.29 ± 0.87      | -0.28 ± 1.06 *  | 0.047 * |
| IL-18 (pg/nl) †                                                                                                              | -21.9 ± 83.7 *   | -9.5 ± 47.7     | 0.291   |
| Leptin (ng/L) †                                                                                                              | -2.44 ± 10.11    | -3.13 ± 10.05 * | 0.696   |
| Adiponectin (µg/ml) †                                                                                                        | 0.05 ± 3.11      | 0.14 ± 1.64     | 0.828   |
| RBP-4 (µg/mL) †                                                                                                              | 2.28 ± 12.75     | -0.82 ± 12.02   | 0.148   |
| Chemerin (ng/ml) †                                                                                                           | -10.2 ± 36.7 *   | -5.2 ± 31.9     | 0.402   |
| Progranulin (ng/ml) †                                                                                                        | -0.82 ± 5.12     | -0.46 ± 5.80    | 0.702   |

ESM Table 1 Secondary outcomes (body composition, blood pressure, inflammatory markers and adipokines) after one year of intervention; Mean ± SD. \*Significant difference within groups or between the group changes, respectively; \*p ≤ 0.05, \*\*p ≤ 0.001.; † per-protocol subgroup
